# Supplementary material
Source: PubMed Central journal article supplement (PMC3434345)
Supplement: cr201257x2.pdf [file cr201257x2.pdf]

## Supplementary information, Table S2

Overlapping sequence between *DHPS* and *WDR83* in representative species in tetraodon

|                | Species              | Gene symbol  | mRNA/EST | Location                |
|----------------|----------------------|--------------|----------|-------------------------|
| Tetrapoda      | <i>X. tropicalis</i> | <i>WDR83</i> | BX685957 | GL173285:564663-572565  |
|                |                      | <i>DHPS</i>  | CR434553 | GL173285:572523-576154  |
| laurasiatheria | Dog                  | <i>WDR83</i> | CO701741 | chr20:52441688-52444650 |
|                |                      | <i>DHPS</i>  | BU744450 | chr20:52439563-52441778 |
| cetariodactyla | Pig                  | <i>WDR83</i> | AK350775 | chr2:55929377-55934338  |
|                |                      | <i>DHPS</i>  | AK347691 | chr2:55934222-55938511  |
|                | Cow                  | <i>WDR83</i> | BC105230 | chr7:13931548-13935244  |
|                |                      | <i>DHPS</i>  | BC120088 | chr7:13935136-13939754  |
| Murinea        | Mouse                | <i>WDR83</i> | BC019369 | chr8:87598934-87604568  |
|                |                      | <i>DHPS</i>  | AK159104 | chr8:87595656-87599060  |
|                | Rat                  | <i>WDR83</i> | AY940050 | chr19:24733303-24738851 |
|                |                      | <i>DHPS</i>  | BC079188 | chr19:24738740-24742830 |
| Primate        | Human                | <i>WDR83</i> | AK223195 | chr19:12780567-12786641 |
|                |                      | <i>DHPS</i>  | L39068   | chr19:12786532-12792617 |
