# Supplementary material
Source: PubMed Central journal article supplement (PMC3434345)
Supplement: cr201257x6.pdf [file cr201257x6.pdf]

## Supplementary information, Figure S2

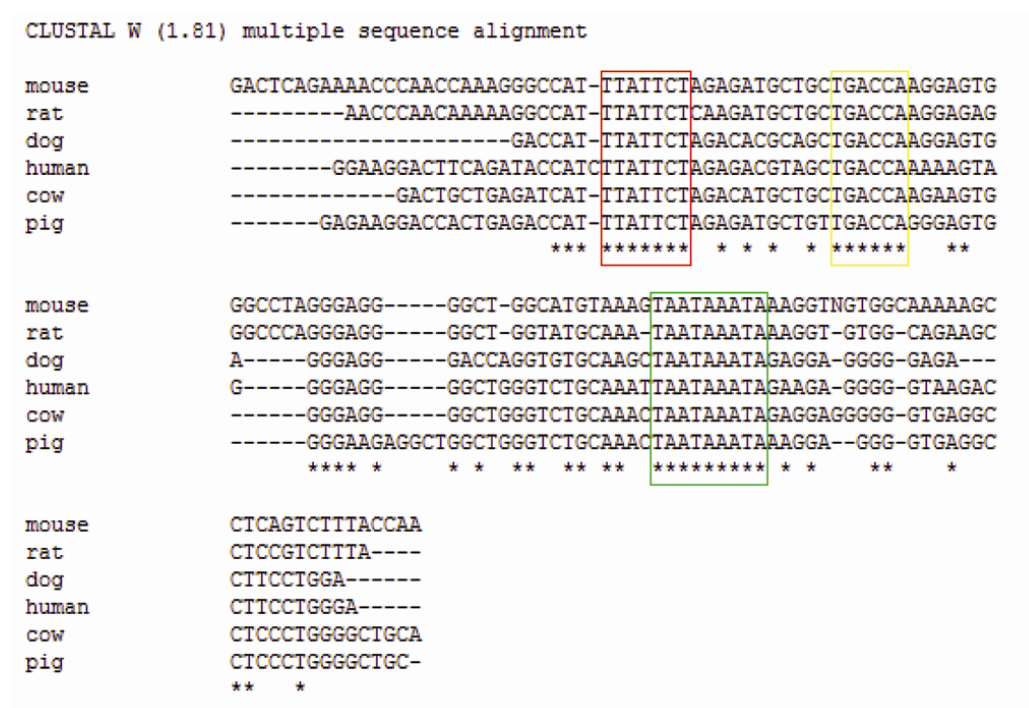

**Figure S2** Sequence alignment of antisense regions in representative species with Clustalw [1]. In these representative species, both *DHPS* and *WDR83* contained exact 3' end structures based on transcriptome data. In the alignment, red, yellow and green boxes show the conserved motives, including AATAAA polyadenylation signals (green box).

## References

- 1 Seemann SE, Menzel P, Backofen R, Gorodkin J. The PETfold and PETcofold web servers for intra- and intermolecular structures of multiple RNA sequences. *Nucleic Acids Res* 2011; **39**(Web Server issue):W107-111.
