# Supplementary material
Source: PubMed Central journal article supplement (PMC3434345)
Supplement: cr201257x7.pdf [file cr201257x7.pdf]

## Supplementary information, Figure S3

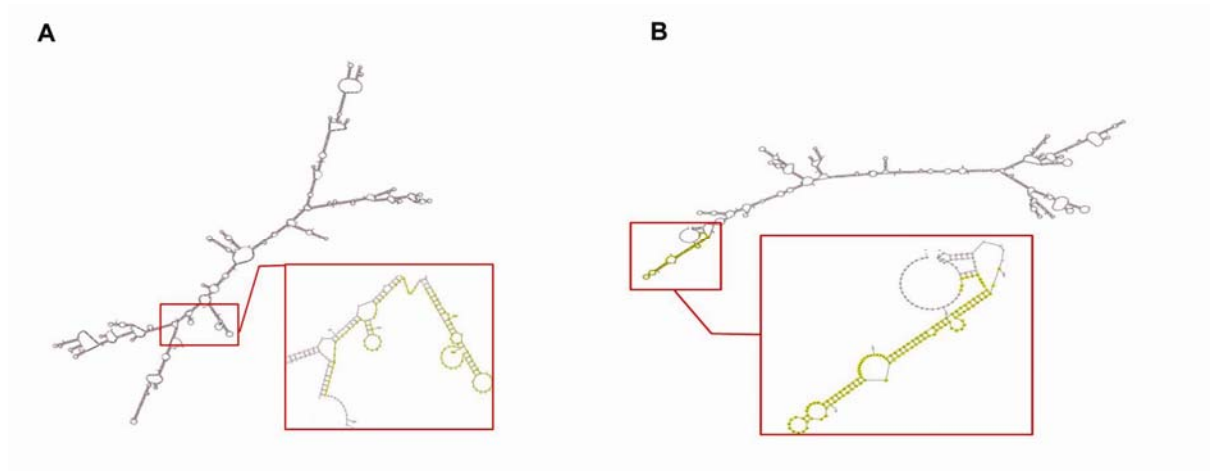

**Figure S3** (A) The second structure of *DHPS* transcript predicted by Mfold [1]. (B) The second structure of *WDR83* transcript predicted by Mfold. The yellow region showed that the antisense region participated in intra-molecular second structure.

### References

- 1 Zuker M. Mfold web server for nucleic acid folding and hybridization prediction. *Nucleic Acids Res* 2003; **31**:3406-3415.
